# Supplementary material for: Recombination Events in Putative Tail Fibre Gene in Litunavirus Phages Infecting Pseudomonas aeruginosa and Their Phylogenetic Consequences
Source: MDPI journal article supplement (doi:10.3390/v14122669), 2022-11-29
Supplement: s1 [file s1]

Table S1. The list of genes coding for seventeen N4-like proteins conserved in *Schitoviridae* family with their position in the genome of selected *Litunavirus*, vB\_Pae1369P-5, used in phylogenetic core-genome analysis in this study.

|    | Phage N4 Product                 | vB_Pae1369P-5 Protein<br>Accession Number | Gene coordinates          |
|----|----------------------------------|-------------------------------------------|---------------------------|
| 1  | RNA polymerase small subunit     | ANT44388.1                                | KX171210.1: 5843-6775     |
| 2  | RNA polymerase large subunit     | ANT44392.1                                | KX171210.1: 7678-8919     |
| 3  | ATPase                           | ANT44403.1                                | KX171210.1: 13787-14857   |
| 4  | gp25                             | ANT44405.1                                | KX171210.1: 15387-16616   |
| 5  | DNA polymerase                   | ANT44408.1                                | KX171210.1: 18399-21014"  |
| 6  | gp42                             | ANT44427.1                                | KX171210.1: 36582-37592   |
| 7  | DNA primase P4 type              | ANT44428.1                                | KX171210.1: 37607-39775   |
| 8  | gp44                             | ANT44429.1                                | KX171210.1: 39824-40558   |
| 9  | virion associated RNA polymerase | ANT44439.1                                | KX171210.1: c44785..54981 |
| 10 | 16.5 kDa protein                 | ANT44441.1                                | KX171210.1: c56547-57014  |
| 11 | gp54                             | ANT44443.1                                | KX171210.1: c59274-60239  |
| 12 | major coat protein               | ANT44445.1                                | KX171210.1: c60965-62164  |
| 13 | gp57 (tape measure)              | ANT44446.1                                | KX171210.1: c62199-63389  |
| 14 | portal protein                   | ANT44448.1                                | KX171210.1: c63797-65977  |
| 15 | 30 kDa protein                   | ANT44452.1                                | KX171210.1: c67110-67745  |
| 16 | terminase, large subunit         | ANT44453.1                                | KX171210.1: c67742-69394  |
| 17 | gp69                             | ANT44454.1                                | KX171210.1: c69391-70119  |
