# Supplementary material for: Recombination Events in Putative Tail Fibre Gene in Litunavirus Phages Infecting Pseudomonas aeruginosa and Their Phylogenetic Consequences
Source: MDPI journal article supplement (doi:10.3390/v14122669), 2022-11-29
Supplement: s1 [file s1]

Table S2. The composition of the variable region used in the phylogenetic analyses in this study and its position in the alignment and in the genome of the selected *Litunavirus*, vB\_Pae1369P-5.

| Partition name                                                            |                                  | Variable region |                                             |                    |                |                          |
|---------------------------------------------------------------------------|----------------------------------|-----------------|---------------------------------------------|--------------------|----------------|--------------------------|
|                                                                           | Putative tail fiber protein gene |                 |                                             |                    |                | adjacent downstream gene |
|                                                                           | N-terminal end                   | GrpE domain     | GDSL-like<br>lipase/acylhydrolase<br>domain | pyocin knob domain | C-terminal end |                          |
| Position in the alignment of<br>tail fibre DNA matrix (nt)                | 1-321                            | 322-690         | 691-2319                                    | 2320-2847          | 2848-3438      | 3438-3990                |
| Position in tail fibre protein<br>gene of the phage<br>vB_Pae1369P-5 (nt) | 1-321                            | 322-606         | 607-2178                                    | 2179-2688          | 2689-3246      | -                        |
| nt - nucleotides                                                          |                                  |                 |                                             |                    |                |                          |
